# Supplementary material for: Biophysical mechanisms of electroconvulsive therapy-induced volume expansion in the medial temporal lobe: a longitudinal in vivo human imaging study
Source: bioRxiv or medRxiv preprint supplement (doi:10.1101/2021.04.19.21255633), 2021-04-22
Supplement: Supplementary file [file media-1.pdf]

## Supplementary Material

Supplementary Table 1. Brain regions determined by the Hammers Atlas.

---

Hippocampus  
Amygdala  
Anterior Medial Temporal Lobe  
Anterior Lateral Temporal Lobe  
Ambient and Parahippocampal Gyri  
Superior Temporal Gyrus  
Inferior Middle Temporal Gyri  
Fusiform Gyrus  
Insula  
Lateral Occipital Lobe  
Anterior Cingulate Gyrus  
Posterior Cingulate Gyrus  
Middle Frontal Gyrus  
Posterior Temporal Lobe  
Inferior Lateral Parietal Lobe  
Caudate Nucleus  
Accumbens Nucleus  
Putamen  
Thalamus  
Pallidum  
Precentral Gyrus  
Gyrus Rectus  
Orbito-Frontal Gyri  
Inferior Frontal Gyrus  
Superior Frontal Gyrus  
Postcentral Gyrus  
Superior Parietal Gyrus  
Lingual Gyrus  
Cuneus

---

Supplementary Table 2. Top-ranked brain regions exposed to the highest EF and brain regions showing the largest volume expansion.

| Electric field (EF) |       |                                |          | Volume expansion |       |                                   |                 |
|---------------------|-------|--------------------------------|----------|------------------|-------|-----------------------------------|-----------------|
| rank                | side  | Brain regions                  | EF (V/m) | rank             | side  | Brain regions                     | Effect size (d) |
| 1                   | right | Precentral gyrus               | 148.2    | 1                | right | Hippocampus                       | 1.92            |
| 2                   | right | Postcentral gyrus              | 143.6    | 2                | right | Amygdala                          | 1.83            |
| 3                   | right | Superior temporal gyrus        | 127.4    | 3                | right | Anterior medial temporal lobe     | 1.77            |
| 4                   | right | Inferior lateral parietal lobe | 127.3    | 4                | right | Inferior middle temporal gyrus    | 1.71            |
| 5                   | right | Middle frontal gyrus           | 127.1    | 5                | right | Insula                            | 1.65            |
| 6                   | right | Inferior middle temporal gyrus | 126.5    | 6                | right | Anterior cingulate gyrus          | 1.51            |
| 7                   | right | Anterior lateral temporal lobe | 122.2    | 7                | right | Posterior cingulate gyrus         | 1.36            |
| 8                   | right | Inferior frontal gyrus         | 118.5    | 8                | right | Ambient and parahippocampal gyrus | 1.34            |
| 9                   | right | Nucleus accumbens              | 118      | 9                | right | Putamen                           | 1.27            |
| 10                  | right | Pallidum                       | 107      | 10               | left  | Inferior frontal gyrus            | 1.25            |

Supplementary Table 3. ECT parameters associated with percentage volume expansion in the right MTL in participants with additional diffusion tensor imaging derived anisotropy modelling

|                            | B    | SE    | $\beta$ | p-value |
|----------------------------|------|-------|---------|---------|
| Total EEG seizure duration | 0.01 | 0.006 | 0.45    | 0.045   |
| Electric field             | 0.12 | 0.08  | 0.32    | 0.15    |
| Number of ECTs (residuals) | 0.35 | 0.40  | 0.18    | 0.40    |

B: non-standardized coefficient; SE: standard error;  $\beta$ : standardized coefficient

**Supplementary Figure 1. Results of the whole-brain DBM analysis with a strict significance threshold.** Given the number of participants in this study (i.e., 30 participants), a whole-brain significance threshold of a voxel-level FWE-corrected  $p < 0.05$  may be too conservative. However, the right MTL volume expansion was still identified at this threshold.

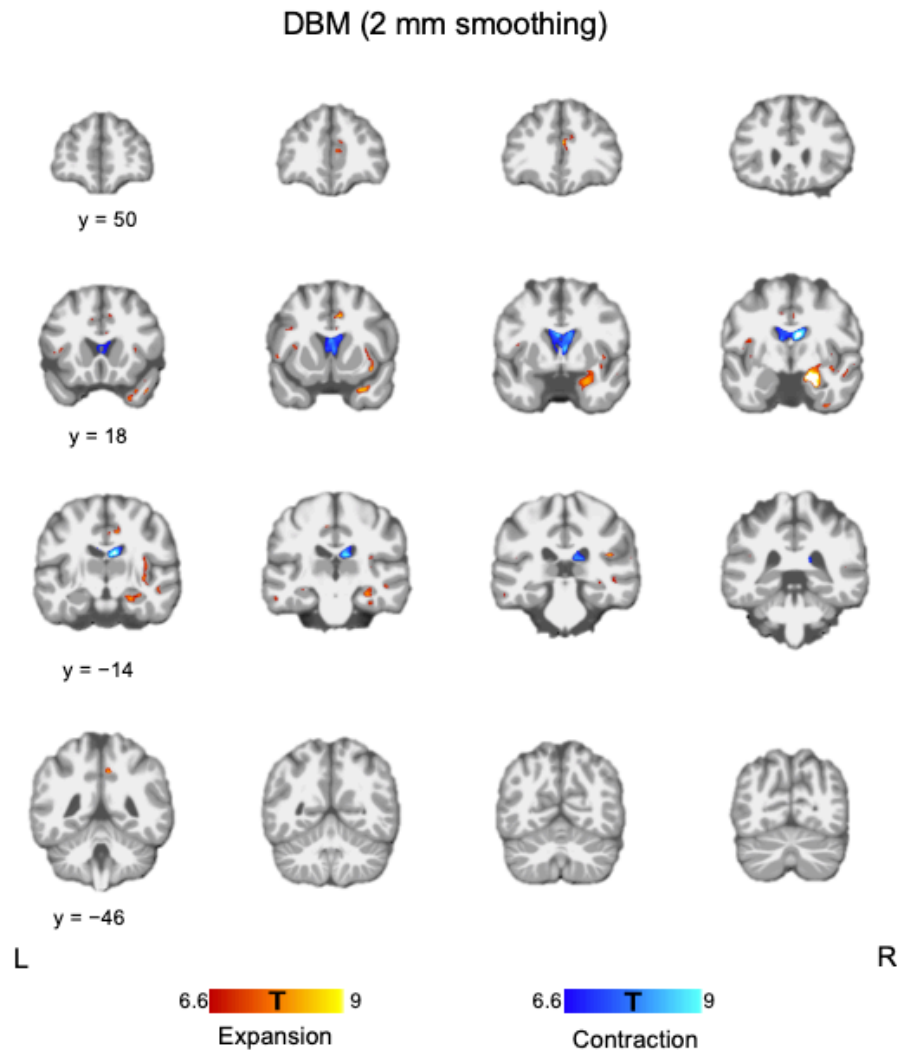

**Supplementary Figure 2.** Electric field distribution and regional volume change following ECT. (a) There was a weak correlation between EF and the effect size of regional volume expansion when including all regions-of-interest in both hemispheres (Spearman's  $\rho = 0.27$ ,  $p = 0.04$ ). (b) There were no correlations between them when analyzing each hemisphere separately (right: Spearman's  $\rho = -0.03$ ,  $p = 0.88$ ; left: Spearman's  $\rho = 0.03$ ,  $p = 0.88$ ). Each region-of-interest (ROI) was defined by the Hammers brain atlas (Supplementary table 1) i.e. each point on the scatter plot represents a different ROI. Y-axis represents the effect size of volume changes (Cohen's  $d$ ).

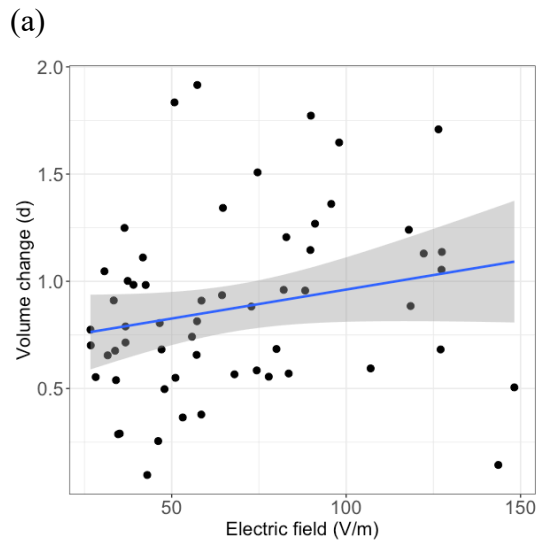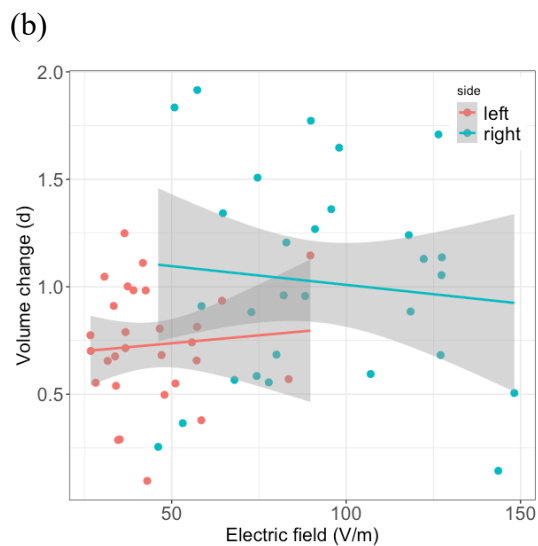

**Supplementary Figure 3.** Electric field distribution and Euclidean distance from brain regions near the stimulus electrodes. (a) There was a strong correlation between EF and Euclidean distance from the right precentral gyrus (PreCG) ( $r = -0.76$ ,  $p < 0.001$ ). The correlations were significant when analyzing each hemisphere separately (right:  $r = -0.58$ ,  $p < 0.001$ ; left:  $r = -0.78$ ,  $p < 0.001$ ). (b) There was a strong correlation between EF and Euclidean distance from the right superior temporal gyrus (STG) ( $r = -0.74$ ,  $p < 0.001$ ). The correlations were significant when analyzing each hemisphere separately (right:  $r = -0.37$ ,  $p = 0.05$ ; left:  $r = -0.47$ ,  $p = 0.009$ ). Each region-of-interest was defined by the Hammers brain atlas (Supplementary table 1).

(a)

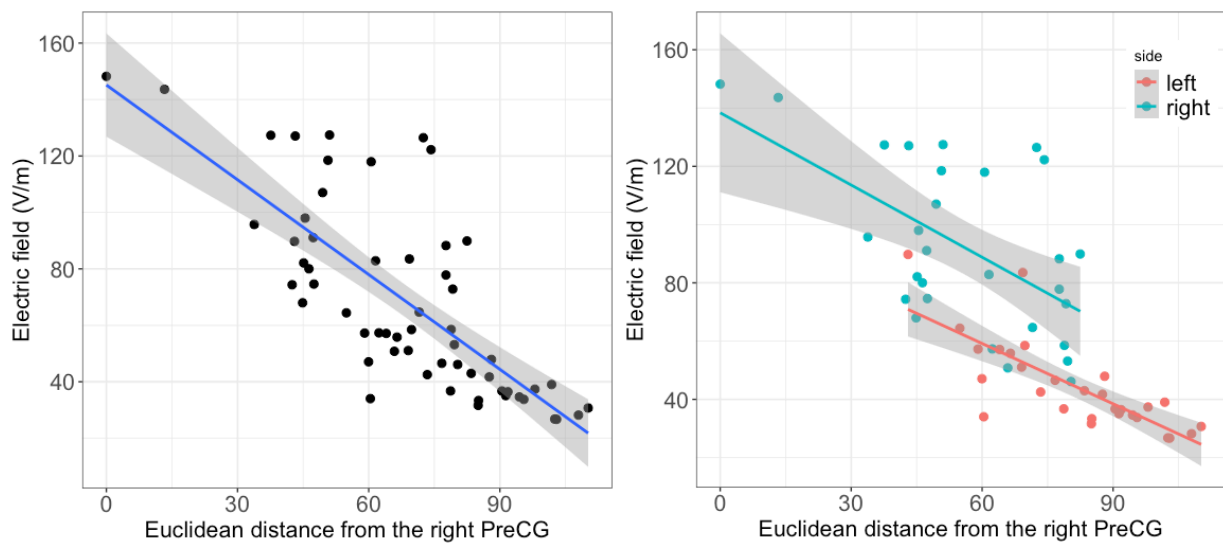

(b)

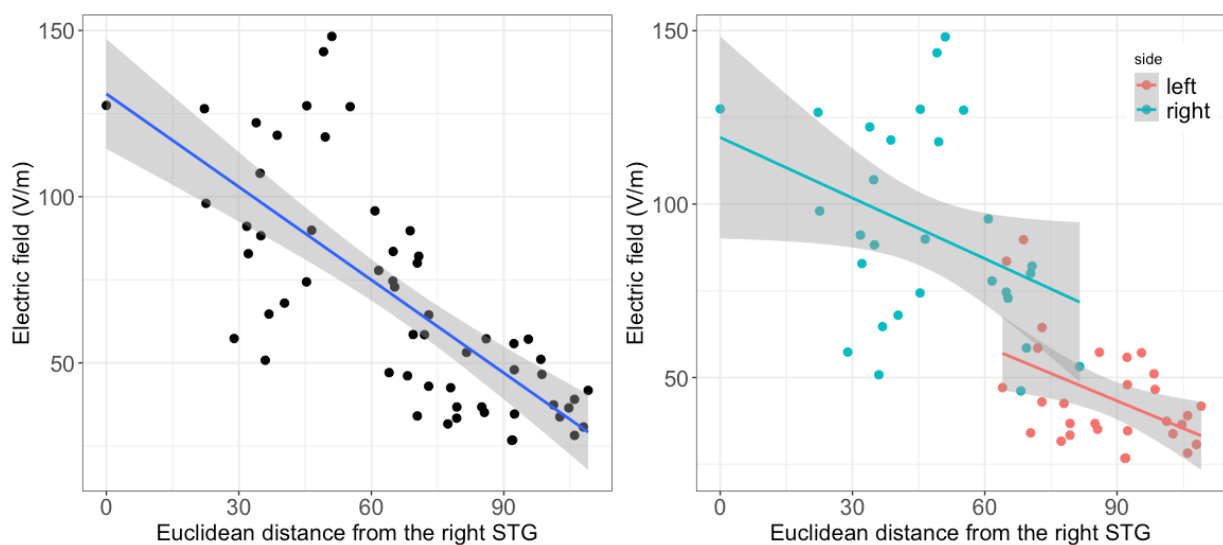

**Supplementary Figure 4. Relationships among tissue-specific volume changes.** (a) GMV increase and WMV decrease (Pearson's  $r = -0.71$ ,  $p < 0.001$ ), (b) WMV increase and WMV decrease (Pearson's  $r = -0.46$ ,  $p = 0.010$ ), and (c) WMV increase and CSF decrease (Pearson's  $r = -0.60$ ,  $p < 0.001$ ) in the peak regions were significantly correlated with each other. The MNI coordinates in each peak region is the following: GMV increase: (20, -9, -20); WMV decrease: (20, -12, -10); WMV increase: (15, 0, 15); and CSF decrease: (10, -10, 20).

(a)

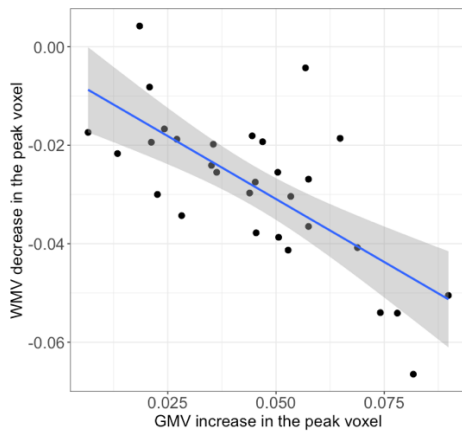

(b)

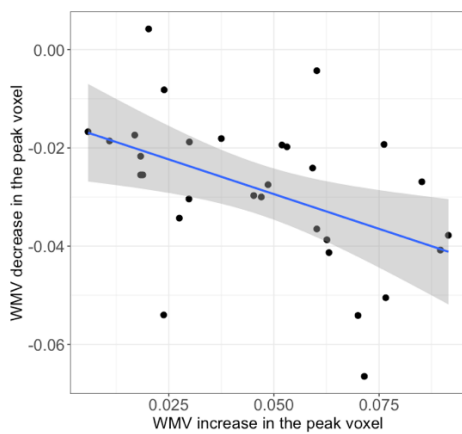

(c)

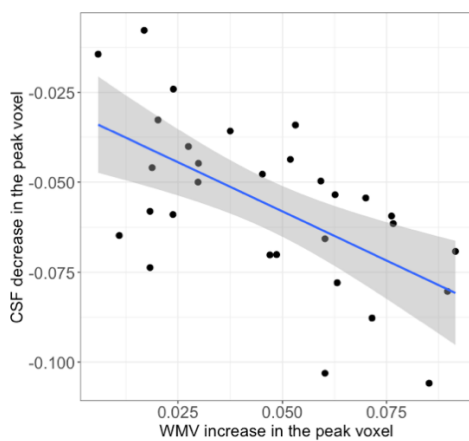

**Supplementary Figure 5.** Relationships between the number of ECTs, seizure duration, and stimulus charge. (a) The number of ECTs was positively correlated with total seizure duration (Pearson's  $r = 0.68$ ,  $p < 0.001$ ). (b) The number of ECTs was negatively correlated with mean seizure duration (Pearson's  $r = -0.51$ ,  $p = 0.004$ ). (c) The number of ECTs was positively correlated with mean stimulus charge (Spearman's  $\rho = 0.44$ ,  $p = 0.01$ ). (d) Mean stimulus charge was negatively correlated with mean seizure duration (Spearman's  $\rho = -0.48$ ,  $p = 0.007$ ).

These results could be interpreted in the context of the anticonvulsant effect of ECT (Sackeim, 1999). Although we did not measure seizure threshold during the ECT course, seizure threshold might increase with the number of ECT sessions and therefore clinicians may need to increase the stimulus dose to induce seizures. Higher stimulus charge relative to each individual's seizure threshold produced shorter seizures (Frey et al., 2001).

(a)

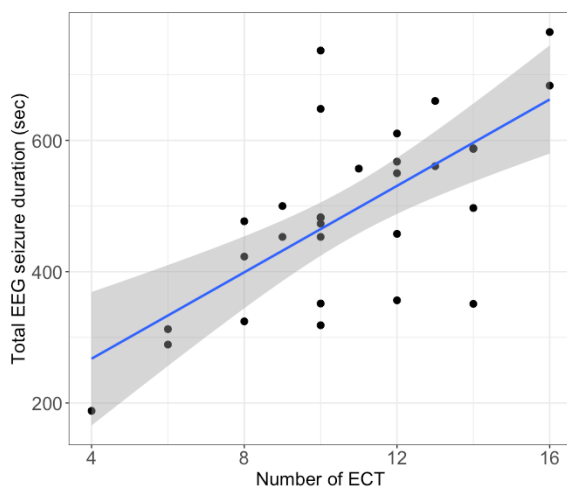

(b)

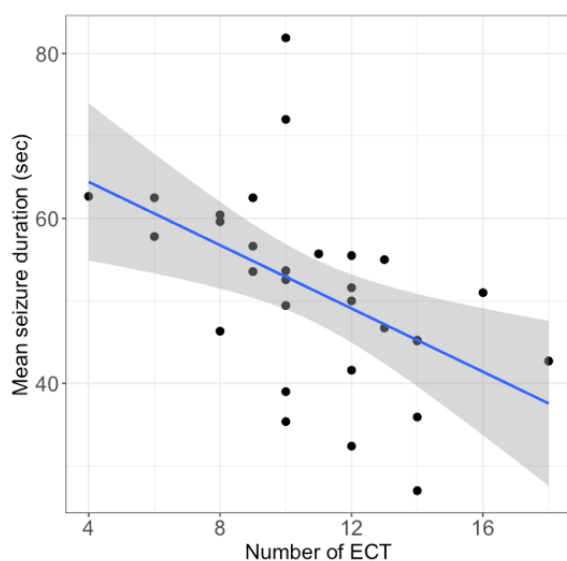

(c)



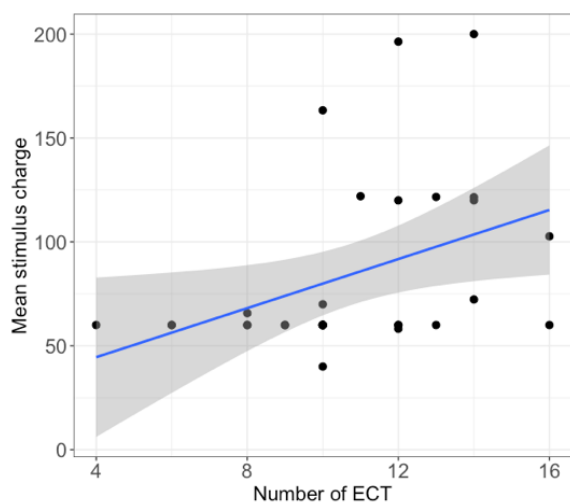

(d)

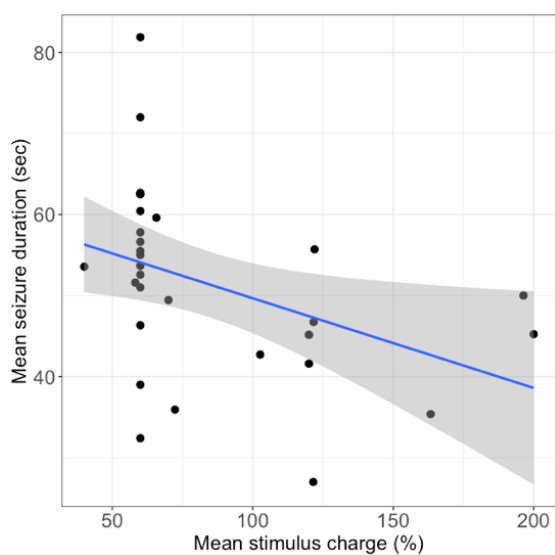

## References

Sackeim HA. The Anticonvulsant Hypothesis of the Mechanisms of Action of ECT: Current Status. *J ECT* 1999; 15: 5–26.

Frey R, Heiden A, Scharfetter J, Schreinzer D, Blasbichler T, Tauscher J, et al. Inverse Relation Between Stimulus Intensity and Seizure Duration: Implications for ECT Procedure. *J ECT* 2001; 17: 102–108.
